# Supplementary material
Source: Springer Nature journal article supplement (https://www.springermedizin.de/resource/supplementary/12916_2013_1113_MOESM1_ESM.pdf/9598510)
Supplement: MOESM1 [file 9598510]

602 eligible patients enrolled

60 patients could not produce sputum

542 patients with 1052 sputum samples

19 patients had no Xpert results  
(tests not done for 17)

523 patients with  $\geq 1$  sputum culture,  $\geq 1$  sputum  
Xpert and sputum AFB microscopy result

431 patients had tuberculosis excluded by  
negative culture results

89 patients had TB diagnosed by  $\geq 1$  positive  
culture result

3 patients had no CRP results  
5 patients with missing urine samples

86 patients with culture-positive TB with data  
permitting analysis stratified by disease severity.  
Urine diagnostics data available for 81 patients.
